# Supplementary material for: Overexpression of lncRNA H19 changes basic characteristics and affects immune response of bovine mammary epithelial cells
Source: PeerJ. 2019 Apr 5;7:e6715. doi: 10.7717/peerj.6715 (PMC6452850; doi:10.7717/peerj.6715)
Supplement: Table S1 [file peerj-07-6715-s001.xlsx]

## Sheet: Sheet1
1*107 bactiria per well
		experimental repeat 1	experimental repeat 2	experimental repeat 3	mean	*dilution ratio	Adherence rate(%)	mean
control	biological repeat 1	119	115	125	119.667	1.19667e+06	11.9667
	biological repeat 2	133	121	128	127.333	1.27333e+06	12.7333	12.4222
	biological repeat 3	129	125	123	125.667	1.25667e+06	12.5667
H19	biological repeat1	88	82	97	89	890000	8.9
	biological repeat 2	75	95	87	85.6667	856667	8.56667	9.11111
	biological repeat 3	94	90	112	98.6667	986667	9.86667
Adherence rate (%)		control	h19
		11.9667	8.9
		12.7333	8.56667
		12.5667	9.86667
average value (%)		12.4222	9.11111
SD		0.403225	0.675223
P value		0.0172558
