# Supplementary material for: Overexpression of lncRNA H19 changes basic characteristics and affects immune response of bovine mammary epithelial cells
Source: PeerJ. 2019 Apr 5;7:e6715. doi: 10.7717/peerj.6715 (PMC6452850; doi:10.7717/peerj.6715)
Supplement: Table S3 [file peerj-07-6715-s003.xlsx]

## Sheet: Sheet1
relative luciferase activity	control	H19
	0.93554	1.34143
	1.0765	1.2559
	1	1.27019
mean	1.00401	1.28917
SD	0.0705651	0.0458143
P value	0.0493488
