# Supplementary material for: Overexpression of lncRNA H19 changes basic characteristics and affects immune response of bovine mammary epithelial cells
Source: PeerJ. 2019 Apr 5;7:e6715. doi: 10.7717/peerj.6715 (PMC6452850; doi:10.7717/peerj.6715)
Supplement: Table S4 [file peerj-07-6715-s004.xlsx]

## Sheet: Sheet1
TNF-a	control	h19	IL-6	control	h19	CXCL2	control	h19	CCL5	control	h19	β-casein	control	h19
	1.0914	1.46514		0.908909	3.19415		1.10612	3.82153		1	1.81547		0.804862	6.0631
	1	1.68889		1	2.87895		0.823828	3.81685		0.994602	1.792		1.21741	8.34204
	0.894137	2.2224		1.0902	2.39568		1	3.0605		1.14772	1.68707		1	9.93712
p	0.995179	1.79215		0.999702	2.82293		0.976648	3.56629		1.04744	1.76485		1.00742	8.11409
sd	0.0987201	0.389046		0.0906449	0.402173		0.142585	0.438031		0.0868854	0.0683697		0.206374	1.94704
